# Supplementary material for: Laser Doppler Velocimetry: Flow Measurement Using a Digital Micromirror Device
Source: Royal Society of Chemistry journal article supplement (doi:10.1039/b703741b), 2014-01-01
Supplement: b703741b.pdf [file b703741b.pdf]

UV absorption cross sections of C<sub>3</sub>F<sub>7</sub>CHO, C<sub>4</sub>F<sub>9</sub>CHO and CF<sub>3</sub>(CF<sub>2</sub>)<sub>5</sub>CH<sub>2</sub>CHO at 298K.

| λ (nm) | σ (cm <sup>2</sup> molecule <sup>-1</sup> ) |                                   |                                                                     |
|--------|---------------------------------------------|-----------------------------------|---------------------------------------------------------------------|
|        | C <sub>3</sub> F <sub>7</sub> CHO           | C <sub>4</sub> F <sub>9</sub> CHO | CF <sub>3</sub> (CF <sub>2</sub> ) <sub>5</sub> CH <sub>2</sub> CHO |
| 230    | 7.84E-22                                    | 4.86E-22                          | 1.27E-20                                                            |
| 231    | 8.05E-22                                    | 4.86E-22                          | 1.18E-20                                                            |
| 232    | 8.53E-22                                    | 4.93E-22                          | 1.13E-20                                                            |
| 233    | 9.01E-22                                    | 5.23E-22                          | 1.14E-20                                                            |
| 234    | 9.91E-22                                    | 5.67E-22                          | 1.18E-20                                                            |
| 235    | 1.04E-21                                    | 6.31E-22                          | 1.25E-20                                                            |
| 236    | 1.07E-21                                    | 6.89E-22                          | 1.29E-20                                                            |
| 237    | 1.13E-21                                    | 7.81E-22                          | 1.35E-20                                                            |
| 238    | 1.24E-21                                    | 9.17E-22                          | 1.41E-20                                                            |
| 239    | 1.36E-21                                    | 1.07E-21                          | 1.49E-20                                                            |
| 240    | 1.48E-21                                    | 1.23E-21                          | 1.59E-20                                                            |
| 241    | 1.61E-21                                    | 1.42E-21                          | 1.68E-20                                                            |
| 242    | 1.74E-21                                    | 1.62E-21                          | 1.76E-20                                                            |
| 243    | 1.93E-21                                    | 1.87E-21                          | 1.83E-20                                                            |
| 244    | 2.13E-21                                    | 2.14E-21                          | 1.90E-20                                                            |
| 245    | 2.35E-21                                    | 2.40E-21                          | 1.97E-20                                                            |
| 246    | 2.59E-21                                    | 2.65E-21                          | 2.05E-20                                                            |
| 247    | 2.85E-21                                    | 2.85E-21                          | 2.11E-20                                                            |
| 248    | 3.16E-21                                    | 3.15E-21                          | 2.19E-20                                                            |
| 249    | 3.51E-21                                    | 3.57E-21                          | 2.31E-20                                                            |
| 250    | 3.88E-21                                    | 4.02E-21                          | 2.43E-20                                                            |
| 251    | 4.27E-21                                    | 4.51E-21                          | 2.51E-20                                                            |
| 252    | 4.65E-21                                    | 4.94E-21                          | 2.52E-20                                                            |
| 253    | 5.12E-21                                    | 5.45E-21                          | 2.51E-20                                                            |
| 254    | 5.65E-21                                    | 6.13E-21                          | 2.52E-20                                                            |
| 255    | 6.25E-21                                    | 7.18E-21                          | 2.57E-20                                                            |
| 256    | 6.92E-21                                    | 7.98E-21                          | 2.65E-20                                                            |
| 257    | 7.54E-21                                    | 8.73E-21                          | 2.76E-20                                                            |
| 258    | 8.19E-21                                    | 9.66E-21                          | 2.87E-20                                                            |
| 259    | 8.93E-21                                    | 1.06E-20                          | 2.99E-20                                                            |
| 260    | 9.74E-21                                    | 1.15E-20                          | 3.12E-20                                                            |
| 261    | 1.06E-20                                    | 1.26E-20                          | 3.25E-20                                                            |
| 262    | 1.15E-20                                    | 1.35E-20                          | 3.37E-20                                                            |
| 263    | 1.23E-20                                    | 1.44E-20                          | 3.50E-20                                                            |
| 264    | 1.33E-20                                    | 1.55E-20                          | 3.64E-20                                                            |
| 265    | 1.44E-20                                    | 1.71E-20                          | 3.80E-20                                                            |
| 266    | 1.56E-20                                    | 1.87E-20                          | 3.96E-20                                                            |
| 267    | 1.67E-20                                    | 2.00E-20                          | 4.10E-20                                                            |
| 268    | 1.79E-20                                    | 2.09E-20                          | 4.21E-20                                                            |
| 269    | 1.9E-20                                     | 2.19E-20                          | 4.29E-20                                                            |
| 270    | 2.03E-20                                    | 2.34E-20                          | 4.39E-20                                                            |
| 271    | 2.26E-20                                    | 2.64E-20                          | 4.58E-20                                                            |
| 272    | 2.39E-20                                    | 2.81E-20                          | 4.71E-20                                                            |
| 273    | 2.51E-20                                    | 2.96E-20                          | 4.84E-20                                                            |
| 274    | 2.67E-20                                    | 3.12E-20                          | 4.94E-20                                                            |

|     |          |          |          |
|-----|----------|----------|----------|
| 275 | 2.83E-20 | 3.30E-20 | 5.01E-20 |
| 276 | 3.01E-20 | 3.49E-20 | 5.07E-20 |
| 277 | 3.19E-20 | 3.69E-20 | 5.12E-20 |
| 278 | 3.37E-20 | 3.90E-20 | 5.16E-20 |
| 279 | 3.53E-20 | 4.10E-20 | 5.22E-20 |
| 280 | 3.7E-20  | 4.30E-20 | 5.27E-20 |
| 281 | 3.88E-20 | 4.50E-20 | 5.34E-20 |
| 282 | 4.06E-20 | 4.70E-20 | 5.38E-20 |
| 283 | 4.25E-20 | 4.92E-20 | 5.38E-20 |
| 284 | 4.45E-20 | 5.14E-20 | 5.34E-20 |
| 285 | 4.63E-20 | 5.36E-20 | 5.30E-20 |
| 286 | 4.82E-20 | 5.59E-20 | 5.26E-20 |
| 287 | 5.02E-20 | 5.82E-20 | 5.23E-20 |
| 288 | 5.22E-20 | 6.06E-20 | 5.19E-20 |
| 289 | 5.42E-20 | 6.28E-20 | 5.19E-20 |
| 290 | 5.59E-20 | 6.45E-20 | 5.20E-20 |
| 291 | 5.76E-20 | 6.64E-20 | 5.20E-20 |
| 292 | 5.93E-20 | 6.84E-20 | 5.13E-20 |
| 293 | 6.11E-20 | 7.07E-20 | 5.00E-20 |
| 294 | 6.28E-20 | 7.28E-20 | 4.87E-20 |
| 295 | 6.45E-20 | 7.48E-20 | 4.79E-20 |
| 296 | 6.64E-20 | 7.70E-20 | 4.74E-20 |
| 297 | 6.85E-20 | 7.94E-20 | 4.69E-20 |
| 298 | 7E-20    | 8.09E-20 | 4.69E-20 |
| 299 | 7.1E-20  | 8.21E-20 | 4.67E-20 |
| 300 | 7.16E-20 | 8.27E-20 | 4.66E-20 |
| 301 | 7.22E-20 | 8.34E-20 | 4.57E-20 |
| 302 | 7.31E-20 | 8.45E-20 | 4.37E-20 |
| 303 | 7.41E-20 | 8.57E-20 | 4.15E-20 |
| 304 | 7.51E-20 | 8.69E-20 | 3.98E-20 |
| 305 | 7.62E-20 | 8.80E-20 | 3.90E-20 |
| 306 | 7.75E-20 | 8.96E-20 | 3.86E-20 |
| 307 | 7.89E-20 | 9.14E-20 | 3.85E-20 |
| 308 | 8.01E-20 | 9.30E-20 | 3.81E-20 |
| 309 | 8.06E-20 | 9.37E-20 | 3.79E-20 |
| 310 | 8E-20    | 9.33E-20 | 3.78E-20 |
| 311 | 7.88E-20 | 9.18E-20 | 3.74E-20 |
| 312 | 7.76E-20 | 9.03E-20 | 3.59E-20 |
| 313 | 7.66E-20 | 8.93E-20 | 3.25E-20 |
| 314 | 7.6E-20  | 8.86E-20 | 2.91E-20 |
| 315 | 7.53E-20 | 8.79E-20 | 2.67E-20 |
| 316 | 7.47E-20 | 8.70E-20 | 2.51E-20 |
| 317 | 7.43E-20 | 8.65E-20 | 2.44E-20 |
| 318 | 7.45E-20 | 8.67E-20 | 2.42E-20 |
| 319 | 7.51E-20 | 8.75E-20 | 2.41E-20 |
| 320 | 7.55E-20 | 8.82E-20 | 2.37E-20 |
| 321 | 7.48E-20 | 8.76E-20 | 2.31E-20 |
| 322 | 7.26E-20 | 8.50E-20 | 2.27E-20 |
| 323 | 6.94E-20 | 8.12E-20 | 2.23E-20 |
| 324 | 6.6E-20  | 7.72E-20 | 2.07E-20 |

|     |          |          |          |
|-----|----------|----------|----------|
| 325 | 6.28E-20 | 7.35E-20 | 1.79E-20 |
| 326 | 6.01E-20 | 7.04E-20 | 1.50E-20 |
| 327 | 5.74E-20 | 6.73E-20 | 1.26E-20 |
| 328 | 5.49E-20 | 6.44E-20 | 1.07E-20 |
| 329 | 5.29E-20 | 6.20E-20 | 1.06E-20 |
| 330 | 5.17E-20 | 6.05E-20 | 1.03E-20 |
| 331 | 5.11E-20 | 5.95E-20 | 9.69E-21 |
| 332 | 5.12E-20 | 5.96E-20 | 9.20E-21 |
| 333 | 5.07E-20 | 5.92E-20 | 9.03E-21 |
| 334 | 4.9E-20  | 5.73E-20 | 8.63E-21 |
| 335 | 4.61E-20 | 5.41E-20 | 7.49E-21 |
| 336 | 4.25E-20 | 5.00E-20 | 6.07E-21 |
| 337 | 3.88E-20 | 4.57E-20 | 4.87E-21 |
| 338 | 3.54E-20 | 4.18E-20 | 4.16E-21 |
| 339 | 3.19E-20 | 3.80E-20 | 3.49E-21 |
| 340 | 2.88E-20 | 3.44E-20 | 3.01E-21 |
| 341 | 2.56E-20 | 3.08E-20 | 2.63E-21 |
| 342 | 2.29E-20 | 2.76E-20 | 2.38E-21 |
| 343 | 2.11E-20 | 2.52E-20 | 2.19E-21 |
| 344 | 1.99E-20 | 2.37E-20 | 1.99E-21 |
| 345 | 1.93E-20 | 2.30E-20 | 1.79E-21 |
| 346 | 1.91E-20 | 2.28E-20 | 1.59E-21 |
| 347 | 1.89E-20 | 2.25E-20 | 1.46E-21 |
| 348 | 1.82E-20 | 2.18E-20 | 1.33E-21 |
| 349 | 1.69E-20 | 2.04E-20 | 1.24E-21 |
| 350 | 1.51E-20 | 1.83E-20 |          |
| 351 | 1.33E-20 | 1.62E-20 |          |
| 352 | 1.41E-20 | 1.41E-20 |          |
| 353 | 1.20E-20 | 1.20E-20 |          |
| 354 | 9.93E-21 | 9.93E-21 |          |
| 355 | 7.79E-21 | 7.79E-21 |          |
| 356 | 5.82E-21 | 5.82E-21 |          |
| 357 | 4.01E-21 | 4.01E-21 |          |
| 358 | 2.63E-21 | 2.63E-21 |          |
| 359 | 2.52E-21 | 2.52E-21 |          |
| 360 | 1.93E-21 | 1.93E-21 |          |
| 361 | 1.57E-21 | 1.57E-21 |          |
| 362 | 1.32E-21 | 1.32E-21 |          |
| 363 | 1.14E-21 | 1.14E-21 |          |
| 364 | 9.94E-22 | 9.94E-22 |          |
| 365 | 8.66E-22 | 8.66E-22 |          |
| 366 |          | 7.67E-22 |          |
| 367 |          | 6.76E-22 |          |
| 368 |          | 6.05E-22 |          |
| 369 |          | 5.77E-22 |          |
| 370 |          | 5.45E-22 |          |
| 371 |          | 5.42E-22 |          |
| 372 |          | 5.27E-22 |          |
| 373 |          | 4.87E-22 |          |
| 374 |          | 4.42E-22 |          |

|     |          |
|-----|----------|
| 375 | 4.15E-22 |
| 376 | 3.68E-22 |
| 377 | 3.31E-22 |
| 378 | 2.90E-22 |
| 379 | 2.96E-22 |
| 380 | 3.01E-22 |
| 381 | 2.79E-22 |
| 382 | 2.76E-22 |
| 383 | 2.53E-22 |
| 384 | 2.48E-22 |
| 385 | 2.42E-22 |
| 386 | 2.33E-22 |
| 387 | 2.16E-22 |
| 388 | 2.11E-22 |
| 389 | 2.06E-22 |
| 390 | 2.20E-22 |
